# Supplementary material for: The causal role of auditory cortex in auditory working memory
Source: eLife. 2021 Apr 29;10:e64457. doi: 10.7554/eLife.64457 (PMC8169109; doi:10.7554/eLife.64457)
Supplement: Figure 1—source data 1. [file elife-64457-fig1-data1.xlsx]

## Sheet: Sheet1
the performance with varying duration										behavior of mice during neural recording sessions
	1.5s	3s	7s	11s	15s						hit	miss	CR	FA	performance
mice1	0.7856	0.8025	0.7533	0.7206	0.695					mice1	0.955224	0.0447761	0.796875	0.203125	0.877863
mice2	0.8732	0.8514	0.85	0.7536	0.6566					mice2	0.910714	0.0892857	0.72549	0.27451	0.82243
mice3	0.8066	0.8137	0.75	0.6659	0.5574					mice3	0.917647	0.0823529	0.957143	0.0428571	0.935484
mice4	0.923	0.9038	0.8432	0.77	0.6037					mice4	0.921348	0.0786517	0.77027	0.22973	0.852761
mice5	0.75	0.7066	0.6475	0.603	0.5824					mice5	0.919192	0.0808081	0.621951	0.378049	0.78453
										mice6	0.885714	0.114286	0.711864	0.288136	0.806202
										mice7	0.8375	0.1625	0.575758	0.424242	0.719178
										mice8	0.955556	0.0444444	0.789474	0.210526	0.879518
										mice9	0.909091	0.0909091	0.8125	0.1875	0.861538
										mice10	0.938776	0.0612245	0.87234	0.12766	0.90625
										mice11	0.927835	0.0721649	0.904255	0.0957447	0.91623
										mice12	0.940476	0.0595238	0.843373	0.156627	0.892216
										mice13	0.928571	0.0714286	0.692308	0.307692	0.814815
