# Supplementary material for: The causal role of auditory cortex in auditory working memory
Source: eLife. 2021 Apr 29;10:e64457. doi: 10.7554/eLife.64457 (PMC8169109; doi:10.7554/eLife.64457)
Supplement: Figure 3—source data 1. [file elife-64457-fig3-data1.xlsx]

## Sheet: Sheet1
AAV-CaMKⅡα-eNpHR3.0-eYFP						AAV-CaMKⅡα-eYFP						Four tones auditory WM task
	OFF performance	ON performance	Δhit (laser on-off)	ΔFA (laser on-off)			OFF performance	ON performance	Δhit (laser on-off)	ΔFA (laser on-off)			OFF performance	ON performance	Δhit (laser on-off)	ΔFA (laser on-off)
mice1	0.82716	0.65	-0.15	0.206707		mice1	0.840336	0.775	-0.0485876	0.0833333		mice1	0.7875	0.590062	-0.0463415	0.25
mice2	0.785714	0.647059	-0.0915966	0.185714		mice2	0.722222	0.782609	0.0448659	-0.0767677		mice2	0.666667	0.699115	-0.0613027	-0.0595238
mice3	0.771429	0.633663	-0.0806938	0.200377		mice3	0.87013	0.871795	-0.0242915	-0.025641		mice3	0.629139	0.562914	-0.0248933	0.0838379
mice4	0.8	0.712766	-0.0425532	0.135195		mice4	0.857143	0.706522	-0.0444444	0.250694		mice4	0.77551	0.552083	-0.125	0.257883
mice5	0.76	0.680412	-0.104898	0.0558333		mice5	0.765957	0.851064	0.0652174	-0.104167		mice5	0.69	0.722772	-0.00347826	-0.0538462
mice6	0.722222	0.611111	-0.037037	0.185185		mice6	0.822917	0.787234	-0.0212766	0.0555797		mice6	0.840708	0.672566	-0.0307882	0.216387
mice7	0.810127	0.56962	-0.125	0.358974		mice7	0.819149	0.833333	-0.0226064	-0.0594499		mice7	0.753846	0.659091	-0.0375	0.105642
mice8	0.761905	0.682692	0.0576923	0.216255
