# Supplementary material for: The causal role of auditory cortex in auditory working memory
Source: eLife. 2021 Apr 29;10:e64457. doi: 10.7554/eLife.64457 (PMC8169109; doi:10.7554/eLife.64457)
Supplement: Figure 4—source data 1. [file elife-64457-fig4-data1.xlsx]

## Sheet: Sheet1
	300-800ms delay deactivation							800-1300ms delay deactivation						300-550 delay deactivation							550-800 delay deactivation					800-1050 delay deactivation					1050-1300 delay deactivation
	OFF performance	ON performance	Δhit (laser on-off)	ΔFA (laser on-off)					OFF performance	ON performance	Δhit (laser on-off)	ΔFA (laser on-off)			Δperformance (laser on-off)	Δhit (laser on-off)	ΔFA (laser on-off)				Δperformance (laser on-off)	Δhit (laser on-off)	ΔFA (laser on-off)			Δperformance (laser on-off)	Δhit (laser on-off)	ΔFA (laser on-off)			Δperformance (laser on-off)	Δhit (laser on-off)	ΔFA (laser on-off)
mice1	0.816092	0.6625	-0.0363636	0.269186				mice1	0.873563	0.869048	0.0237844	0.0454545		mice1	-0.116189	-0.0968992	0.140244			mice1	-0.148764	-0.0588235	0.240336		mice1	-0.049159	0.0221631	0.119048		mice1	0.0503731	0.00189394	-0.0992647
mice2	0.769231	0.794118	-0.0178571	-0.0606061				mice2	0.768116	0.838235	0.0258467	-0.114286		mice2	-0.0708181	-0.03125	0.11828			mice2	-0.0776439	-0.0267131	0.129878		mice2	0.0164251	-0.0405138	-0.0652174		mice2	0.00660981	-0.0034632	-0.0201681
mice3	0.776596	0.631579	-0.0778986	0.219415				mice3	0.852941	0.823529	-0.0380392	0.0241327		mice3	0.052381	0.0395501	-0.0668954			mice3	-0.114286	0	0.226415		mice3	-0.121451	0.0219512	0.258286		mice3	-0.051607	-0.00158562	0.103359
mice4	0.841121	0.737864	-0.0415385	0.161235				mice4	0.8875	0.753086	-0.025	0.239634		mice4	-0.0429487	-0.0263158	0.0642857			mice4	-0.150943	-0.0410053	0.26		mice4	0.020765	-0.025584	-0.0526882		mice4	0.0407925	-0.0291607	-0.11132
mice5	0.866667	0.747253	-0.0410628	0.2				mice5	0.811111	0.852273	0.0211416	-0.0603865		mice5	-0.040404	-0.104898	-0.0277551			mice5	0.0185652	-0.0233918	-0.0583215		mice5	-0.0126582	-0.0769231	-0.05		mice5	0.00249169	-0.0238095	-0.030303
mice6	0.732143	0.785047	0.0286388	-0.0787037				mice6	0.879121	0.847826	-0.0434783	0.0169082		mice6	-0.130128	-0.0408163	0.218112			mice6	-0.117215	0.0199468	0.25		mice6	-0.00957592	-0.0221484	0		mice6	-0.054057	-0.0833333	0.0265957
mice7	0.840909	0.613636	-0.115657	0.335624				mice7	0.831325	0.733333	-0.0448505	0.135963		mice7	-0.105329	-0.125	0.0906817			mice7	-0.292822	-0.18355	0.380252		mice7	-0.0363636	0.0350168	0.100649		mice7	0.121951	0.0487805	-0.195122
mice8	0.798077	0.656863	-0.0196078	0.264521				mice8	0.808824	0.816901	-0.0252101	-0.0424837		mice8	-0.0481975	0.0232558	0.119697			mice8	-0.124103	-0.0755735	0.171171							mice8	0.0625918	-0.0470383	-0.170732
