# Supplementary material for: The causal role of auditory cortex in auditory working memory
Source: eLife. 2021 Apr 29;10:e64457. doi: 10.7554/eLife.64457 (PMC8169109; doi:10.7554/eLife.64457)
Supplement: Figure 5—source data 1. [file elife-64457-fig5-data1.xlsx]

## Sheet: Sheet1
	3s delay 300-800ms delay deactivation						3s delay 800-2700ms delay deactivation							7s delay 300-800ms delay deactivation						7s delay 800-6700ms delay deactivation
	OFF performance	ON performance	Δhit (laser on-off)	ΔFA (laser on-off)			OFF performance	ON performance	Δhit (laser on-off)	ΔFA (laser on-off)				OFF performance	ON performance	Δhit (laser on-off)	ΔFA (laser on-off)			OFF performance	ON performance	Δhit (laser on-off)	ΔFA (laser on-off)
mice1	0.857143	0.75	-0.0324859	0.183333		mice1	0.896552	0.916667	0.00229885	-0.037931			mice1	0.893204	0.830189	-0.0192308	0.102397		mice1	0.88172	0.829787	0.0212766	0.123959
mice2	0.747126	0.715909	-0.139535	-0.0767677		mice2	0.80303	0.786885	-0.00416667	0.0313093			mice2	0.708861	0.75	-0.0480769	-0.125		mice2	0.880597	0.785714	-0.0546218	0.134199
mice3	0.884615	0.753086	-0.075	0.181643		mice3	0.9	0.775	-0.00182927	0.246795			mice3	0.833333	0.730769	-0.00337382	0.194872		mice3	0.828571	0.871429	-0.0571429	-0.142857
mice4	0.868132	0.777778	-0.0222222	0.15942		mice4	0.830986	0.84507	-0.0319328	-0.0608108			mice4	0.753846	0.661765	-0.0294118	0.139469		mice4	0.772152	0.802632	-0.025641	-0.0777027
mice5	0.795455	0.755556	-0.0491543	0.0236944		mice5	0.923077	0.886076	-0.025641	0.0474359			mice5	0.84058	0.746479	-0.0539216	0.142857		mice5	0.875	0.876543	-0.025641	-0.0284553
mice6	0.814433	0.659794	-0.0575	0.268346		mice6	0.855556	0.78022	-0.0864734	0.0666667			mice6	0.819149	0.677083	-0.0407801	0.243351		mice6	0.835052	0.757895	0.0407801	0.192602
mice7	0.765432	0.682353	-0.0113636	0.170732		mice7	0.710526	0.779221	0.0526316	-0.0890688			mice7	0.777778	0.7	0.0464646	0.207729		mice7	0.855556	0.763441	-0.0609929	0.125604
mice8	0.8125	0.640625	-0.133065	0.204545		mice8	0.906667	0.833333	-0.0506073	0.0942481
