# Supplementary material for: The causal role of auditory cortex in auditory working memory
Source: eLife. 2021 Apr 29;10:e64457. doi: 10.7554/eLife.64457 (PMC8169109; doi:10.7554/eLife.64457)
Supplement: Figure 6—source data 1. [file elife-64457-fig6-data1.xlsx]

## Sheet: Sheet1
Learning proces of WM with distractor	0th simple WM task		1st day WM with distractor		2nd day WM with distractor		3rd day WM with distractor				WM with distractor optogenetic experiment
	performance		performance		performance		performance					laser OFF performance	laser ON performance	Δhit (laser on-off)	ΔFA (laser on-off)
mice1	0.828877		0.722222		0.718232		0.846591				mice1	0.781609	0.617284	-0.0343681	0.297674
mice2	0.79085		0.792208		0.705036		0.746032				mice2	0.746032	0.705882	-0.0428571	0.0606061
mice3	0.746341		0.673077		0.828571		0.790244				mice3	0.734043	0.666667	-0.0561594	0.0833333
mice4	0.842105		0.711765		0.812121		0.808642				mice4	0.775701	0.693069	0.0161538	0.183957
mice5	0.877778		0.871795		0.858696		0.778351				mice5	0.877778	0.793478	-0.0642512	0.104348
mice6	0.890995		0.727273		0.610778		0.69802				mice6	0.714286	0.691589	-0.0249326	0.0171958
mice7	0.809249		0.617834		0.688312		0.855422				mice7	0.795455	0.579545	-0.116162	0.311311
mice8	0.851282		0.736196		0.734807		0.780347				mice8	0.798077	0.68	-0.0456182	0.187569
mice9	0.778378		0.701087		0.805714		0.856115				mice9	0.736264	0.857143	0.0868687	-0.156337
