# Supplementary material for: The causal role of auditory cortex in auditory working memory
Source: eLife. 2021 Apr 29;10:e64457. doi: 10.7554/eLife.64457 (PMC8169109; doi:10.7554/eLife.64457)
Supplement: Figure 7—source data 1. [file elife-64457-fig7-data1.xlsx]

## Sheet: Sheet1
	delayed go/no_go task							go/no_go task
	OFF performance	ON performance	Δhit (laser on-off)	ΔFA (laser on-off)				OFF performance	ON performance	Δhit (laser on-off)	ΔFA (laser on-off)
mice1	0.857143	0.709302	-0.108333	0.173913			mice1	0.921053	0.815789	-0.0540541	0.153846
mice2	0.829787	0.683673	-0.124113	0.162128			mice2	0.848837	0.821429	-0.0499419	0.00581395
mice3	0.72	0.779221	0.0512821	-0.0745614			mice3	0.808081	0.757895	-0.00347826	0.0816327
mice4	0.858586	0.803922	0.00480769	0.124314			mice4	0.78	0.603175	0.0459259	0.318889
mice5	0.782609	0.857143	0.0434783	-0.103382			mice5	0.923077	0.883117	-0.0276653	0.0512821
mice6	0.786517	0.741573	-0.0180879	0.083004			mice6	0.877778	0.88764	-0.0232323	-0.0444444
mice7	0.691176	0.757576	0.0827206	-0.0588235			mice7	0.821918	0.878788	0.0218045	-0.0921659
mice8	0.865854	0.8125	-0.0707317	0.0384615			mice8	0.906667	0.897436	-0.0506073	-0.033957
							mice9	0.735294	0.794118	-0.0285714	-0.151515
